# Supplementary material
Source: publisher figshare collection journal article supplement (https://sage.figshare.com/ndownloader/files/14026523)
Supplement: Supplementary file 1 [file 14026523]

## ONLINE SUPPLEMENTARY MATERIALS

Table S-1

Summary of Effect Sizes for Lower-to-Middle Managers and Human Resource Management Content, Process, and Outcomes

| Article                                               | Management Factor                               | HRM-CPO Category                               | <i>r</i> | $\beta$ | <i>B</i> | <i>R</i> <sup>2</sup> | $\Delta R^2$ | <i>d</i> |
|-------------------------------------------------------|-------------------------------------------------|------------------------------------------------|----------|---------|----------|-----------------------|--------------|----------|
| Alfes, Shantz, Truss, & Soane (2013)                  | Leader-member exchange                          | Perceived HR practices (C)                     | .52      | —       | —        | —                     | —            | —        |
|                                                       |                                                 | Engagement (O)                                 | .50      | —       | —        | —                     | —            | —        |
|                                                       |                                                 | Organizational citizenship behaviors (OCB) (O) | .16      | .15     | —        | —                     | —            | —        |
| Alfes, Truss, Soane, Rees, & Gatenby (2013) – Study 1 | Behavior (effectiveness, equity, and integrity) | Perceived HR practices (C)                     | .52      | .57     | —        | —                     | —            | —        |
|                                                       |                                                 | Engagement (O)                                 | .34      | .25     | —        | —                     | —            | —        |
| Alfes, Truss, Soane, Rees, & Gatenby (2013) – Study 2 | Behavior (effectiveness, equity, and integrity) | Perceived HR practices (C)                     | .53      | .54     | —        | —                     | —            | —        |
|                                                       |                                                 | Engagement (O)                                 | .36      | .26     | —        | —                     | —            | —        |
| Ali & Konrad (2017)                                   | Gender diversity                                | Gender diversity practices (C)                 | .12      | —       | —        | —                     | —            | —        |
|                                                       |                                                 | Diversity leadership practices (C)             | .13      | —       | —        | —                     | —            | —        |
|                                                       |                                                 | Work-life programs (C)                         | .13      | —       | —        | —                     | —            | —        |
|                                                       |                                                 | Net profit margin (O)                          | .06      | —       | 219.49   | —                     | —            | —        |
|                                                       |                                                 | Return on assets (O)                           | .11      | —       | 32.63    | —                     | —            | —        |
|                                                       |                                                 | Corporate social responsibility (O)            | .05      | —       | -.37     | —                     | —            | —        |
| Azmi & Mushtaq (2015)                                 | Involvement in HRM decision making              | HRM effectiveness (O)                          | —        | .21     | —        | —                     | —            | —        |
|                                                       |                                                 | HRM status (O)                                 | —        | -.19    | —        | —                     | —            | —        |
|                                                       |                                                 | Organizational performance (O)                 | —        | .72     | —        | —                     | —            | —        |
|                                                       | Involvement in HRM process/activities           | HRM effectiveness (O)                          | —        | .25     | —        | —                     | —            | —        |
|                                                       |                                                 | HRM status (O)                                 | —        | .55     | —        | —                     | —            | —        |
|                                                       |                                                 | Organizational performance (O)                 | —        | .33     | —        | —                     | —            | —        |
|                                                       | Involvement in HRM budgeting                    | HRM effectiveness (O)                          | —        | .06     | —        | —                     | —            | —        |
|                                                       |                                                 | HRM status (O)                                 | —        | .08     | —        | —                     | —            | —        |
|                                                       |                                                 | Organizational performance (O)                 | —        | -.88    | —        | —                     | —            | —        |
| Bennington (2006)                                     | Gender                                          | Equal employment opportunities (O)             | —        | —       | —        | —                     | —            | —        |
| Bos-Nehles, Van Riemsdijk, & Looise (2013)            | Ability                                         | HRM implementation effectiveness (O)           | .05      | —       | —        | —                     | —            | —        |
|                                                       | Motivation                                      | HRM implementation effectiveness (O)           | -.23     | —       | —        | —                     | —            | —        |
|                                                       | Opportunity                                     | HRM implementation effectiveness (O)           | .28      | —       | —        | —                     | —            | —        |
|                                                       | Support felt by LTMMs                           | HRM implementation effectiveness (O)           | .28      | —       | —        | —                     | —            | —        |
| Brandl, Madsen, & Madsen (2009)                       | Gender                                          | Priority given to HRM (P)                      | —        | —       | —        | —                     | —            | —        |
| Brewster, Brookes, & Gollan (2015)                    | Responsibility for HRM                          | Strategic role of HR department (P)            | —        | —       | —        | —                     | —            | —        |
| Caza (2011)                                           | Discretion over HRM                             | Unit performance (O)                           | .07      | —       | —        | —                     | —            | —        |
|                                                       | Commitment                                      | Unit performance (O)                           | .00      | —       | —        | —                     | —            | —        |
|                                                       | Education                                       | Unit performance (O)                           | -.01     | —       | —        | —                     | —            | —        |
|                                                       | Experience                                      | Unit performance (O)                           | .06      | —       | —        | —                     | —            | —        |
| Chen, Hsu, & Yip (2011)                               | Perception discrepancy                          | Perceived future firm performance (O)          | .33      | -.34    | —        | —                     | —            | —        |

| Article                                   | Management Factor                                                                                      | HRM-CPO Category                             | <i>r</i> | $\beta$ | <i>B</i> | <i>R</i> <sup>2</sup> | $\Delta R^2$ | <i>d</i> |
|-------------------------------------------|--------------------------------------------------------------------------------------------------------|----------------------------------------------|----------|---------|----------|-----------------------|--------------|----------|
| Chuang, Jackson, & Jiang (2016)           | Horizontal collaboration with HR manager                                                               | Perceived future firm performance (O)        | .16      | .10     | –        | –                     | –            | –        |
|                                           |                                                                                                        | Manager type (HR vs. LTMM)                   | .32      | –       | –        | –                     | –            | .67      |
|                                           | Perception discrepancy                                                                                 | Different gender dyad (HR-LTMM)              | .38      | –       | –        | –                     | –            | .81      |
|                                           |                                                                                                        | Same gender dyad (HR-LTMM)                   | .12      | –       | –        | –                     | –            | .23      |
|                                           | Empowering leadership                                                                                  | HR systems for knowledge-intensive teams (C) | -.17     | –       | –        | –                     | –            | –        |
|                                           |                                                                                                        | Team knowledge acquisition (O)               | .10      | –       | -.13     | –                     | –            | –        |
|                                           |                                                                                                        | Team knowledge sharing (O)                   | .33      | –       | .31      | –                     | –            | –        |
|                                           | Employee attachment-anxiety                                                                            | Career growth opportunities (C)              | .14      | .09     | –        | –                     | –            | –        |
|                                           |                                                                                                        | Internal career development activities (C)   | .12      | –       | –        | –                     | –            | –        |
|                                           |                                                                                                        | Trust in organization (O)                    | .05      | .07     | –        | –                     | –            | –        |
| Crawshaw & Game (2015)                    | Employee attachment-anxiety                                                                            | Turnover intentions (O)                      | -.05     | –       | –        | –                     | –            | –        |
|                                           |                                                                                                        | Career growth opportunities (C)              | -.29     | -.09    | –        | –                     | –            | –        |
|                                           |                                                                                                        | Internal career development activities (C)   | -.18     | –       | –        | –                     | –            | –        |
|                                           | Employee attachment-avoidance                                                                          | Trust in organization (O)                    | -.32     | -.31    | –        | –                     | –            | –        |
|                                           |                                                                                                        | Turnover intentions (O)                      | .24      | –       | –        | –                     | –            | –        |
|                                           |                                                                                                        |                                              |          |         |          |                       |              |          |
| Dany, Guedri, & Hatt (2008)               | Complete influence over HRM<br>Consultation with HR specialist<br>HR specialist consultation with LTMM | Organizational performance (O)               | –        | –       | .68      | –                     | –            | –        |
|                                           |                                                                                                        | Organizational performance (O)               | –        | –       | .22      | –                     | –            | –        |
|                                           |                                                                                                        | Organizational performance (O)               | –        | –       | .63      | –                     | –            | –        |
| Darwish & Singh (2013)                    | Responsibility for HRM                                                                                 | Employee turnover (O)                        | -.46     | -.01    | –        | –                     | –            | –        |
|                                           |                                                                                                        | Return on assets (O)                         | .38      | .11     | –        | –                     | –            | –        |
|                                           |                                                                                                        | Return on equity (O)                         | .24      | -.01    | –        | –                     | –            | –        |
| Den Hartog, Boon, Verburg, & Croon (2013) | HRM effectiveness perceptions                                                                          | Perceived unit performance (O)               | .17      | .03     | –        | –                     | –            | –        |
|                                           |                                                                                                        | Employee satisfaction (O)                    | .16      | .03     | –        | –                     | –            | –        |
|                                           |                                                                                                        | Employee rated HRM effectiveness (P)         | .59      | .30     | –        | –                     | –            | –        |
|                                           | Communication                                                                                          | Perceived unit performance (O)               | .42      | .17     | –        | –                     | –            | –        |
|                                           |                                                                                                        | Employee satisfaction (O)                    | .41      | .05     | –        | –                     | –            | –        |
|                                           |                                                                                                        |                                              |          |         |          |                       |              |          |
| Dewettinck & Vroonen (2017) – Study 1     | Performance management (PM) attitude                                                                   | Formal PM frequency (P)                      | .11      | .20     | –        | .02                   | –            | –        |
|                                           |                                                                                                        | Formal PM duration (P)                       | .14      | .21     | –        | .03                   | –            | –        |
|                                           |                                                                                                        | Informal PM frequency (P)                    | .18      | .26     | –        | .05                   | –            | –        |
|                                           | Span of control                                                                                        | Formal PM frequency (P)                      | -.05     | –       | –        | –                     | –            | –        |
|                                           |                                                                                                        | Formal PM duration (P)                       | -.02     | –       | –        | –                     | –            | –        |
|                                           |                                                                                                        | Informal PM frequency (P)                    | -.07     | –       | –        | –                     | –            | –        |
| Dewettinck & Vroonen (2017) – Study 2     | Formal PM frequency                                                                                    | Employee engagement (O)                      | .14      | .04     | –        | –                     | –            | –        |
|                                           |                                                                                                        | Employee job satisfaction (O)                | .21      | .08     | –        | –                     | –            | –        |
|                                           | Formal PM duration                                                                                     | Employee engagement (O)                      | .09      | .06     | –        | –                     | –            | –        |
|                                           |                                                                                                        | Employee job satisfaction (O)                | -.03     | -.04    | –        | –                     | –            | –        |
|                                           | Informal PM frequency                                                                                  | Employee engagement (O)                      | .23      | .10     | –        | –                     | –            | –        |
|                                           |                                                                                                        | Employee job satisfaction (O)                | .23      | .09     | –        | –                     | –            | –        |
|                                           | Servant leadership                                                                                     | Management initiatives (C)                   | .11      | –       | –        | –                     | –            | –        |
|                                           |                                                                                                        | Employee creativity (O)                      | .08      | –       | –        | –                     | –            | –        |
| Do, Budhwar, & Patel (2018)               | Servant leadership                                                                                     | Firm innovation (O)                          | -.04     | –       | –        | –                     | –            | –        |
|                                           |                                                                                                        |                                              |          |         |          |                       |              |          |

| Article                           | Management Factor                                      | HRM-CPO Category                        | <i>r</i> | $\beta$ | <i>B</i> | <i>R</i> <sup>2</sup> | $\Delta R^2$ | <i>d</i> |
|-----------------------------------|--------------------------------------------------------|-----------------------------------------|----------|---------|----------|-----------------------|--------------|----------|
|                                   |                                                        | Firm market performance (O)             | .01      | –       | –        | –                     | –            | –        |
| Dysvik & Kuvaas (2012)            | Support felt by employees                              | Investment in employee development (C)  | .50      | .46     | –        | .34                   | .21          | –        |
|                                   |                                                        | Unit performance (O)                    | .37      | .32     | –        | .19                   | .01          | –        |
| Gilbert, De Winne, & Sels (2011a) | HR competency                                          | HR role ambiguity (O)                   | -.60     | -.48    | –        | .45                   | –            | –        |
|                                   |                                                        | HR role overload (O)                    | -.43     | -.30    | –        | .27                   | –            | –        |
| Gilbert, De Winne, & Sels (2011b) | HR enactment                                           | LTMM relationship behaviors (P)         | .83      | –       | –        | –                     | –            | –        |
|                                   |                                                        | Employee affective commitment (O)       | .52      | .19     | –        | –                     | –            | –        |
|                                   |                                                        | LTMM relationship behaviors             | .50      | .20     | –        | –                     | –            | –        |
| Gilbert, De Winne, & Sels (2015)  | Ability                                                | HRM system strength (P)                 | .37      | .27     | –        | .23                   | –            | –        |
|                                   |                                                        | HRM implementation effectiveness (O)    | .06      | .29     | –        | –                     | –            | –        |
|                                   | Motivation                                             | HRM system strength (P)                 | .39      | .35     | –        | .25                   | –            | –        |
|                                   |                                                        | HRM implementation effectiveness (O)    | .06      | .08     | –        | –                     | –            | –        |
|                                   | Opportunity                                            | HRM system strength (P)                 | .37      | .20     | –        | .14                   | –            | –        |
|                                   |                                                        | HRM implementation effectiveness (O)    | .05      | .19     | –        | –                     | –            | –        |
| Han, Bartol, & Kim (2015)         | Contingent-reward leadership                           | Individual pay-for-performance (C)      | .22      | –       | –        | –                     | –            | –        |
|                                   |                                                        | Performance-reward expectancy (P)       | .19      | .37     | –        | –                     | –            | –        |
|                                   |                                                        | Job performance (O)                     | .11      | .07     | –        | –                     | –            | –        |
| Hong, Liao, Raub, & Han (2016)    | Empowering leadership                                  | Initiative-enhancing HR systems (C)     | –        | –       | –        | –                     | –            | –        |
|                                   |                                                        | Initiative climate (O)                  | .19      | .11     | –        | –                     | –            | –        |
|                                   |                                                        | Employee role-breadth self-efficacy (O) | –        | -.01    | –        | .27                   | –            | –        |
|                                   |                                                        | Employee intrinsic motivation (O)       | –        | .08     | –        | .31                   | –            | –        |
|                                   |                                                        | Employee activated positive affect (O)  | –        | .01     | –        | .35                   | –            | –        |
| Jiang, Chuang, & Chiao (2015)     | Service leadership                                     | Service-oriented HR systems (C)         | .08      | –       | –        | –                     | –            | –        |
|                                   |                                                        | Collective customer knowledge (O)       | .12      | –       | .46      | –                     | –            | –        |
|                                   |                                                        | Service climate (O)                     | .50      | –       | 1.23     | –                     | –            | –        |
|                                   |                                                        | Service performance (O)                 | .18      | –       | –        | –                     | –            | –        |
|                                   |                                                        | Operating profit margin (O)             | -.02     | –       | –        | –                     | –            | –        |
|                                   |                                                        | Sales growth rate (O)                   | -.08     | –       | –        | –                     | –            | –        |
| Kuvaas & Dysvik (2010)            | Support for employees                                  | Investment in employee development (C)  | .45      | –       | –        | –                     | –            | –        |
|                                   |                                                        | Employee affective commitment (O)       | .51      | .52     | –        | .31                   | .25          | –        |
|                                   |                                                        | Employee turnover intentions (O)        | -.53     | -.51    | –        | .31                   | .25          | –        |
|                                   |                                                        | Employee work effort (O)                | .21      | .20     | –        | .09                   | .03          | –        |
|                                   |                                                        | Employee work quality (O)               | .08      | .09     | –        | .02                   | .01          | –        |
|                                   |                                                        | Employee OCB (O)                        | .13      | .13     | –        | .05                   | .02          | –        |
| Kuvaas, Dysvik, & Buch (2014)     | Partnership with HR department<br>HR training received | Enabling HR (P)                         | .32      | -.02    | –        | –                     | –            | –        |
|                                   |                                                        | Enabling HR (P)                         | .51      | .62     | –        | –                     | –            | –        |
|                                   |                                                        | Enabling HR (P)                         | .22      | .16     | –        | –                     | –            | –        |
|                                   | Support for employees                                  | Employee intrinsic motivation (O)       | .32      | .42     | –        | –                     | –            | –        |
|                                   |                                                        | Employee affective commitment (O)       | .34      | .43     | –        | –                     | –            | –        |
|                                   |                                                        | Employee turnover intentions (O)        | -.35     | -.43    | –        | –                     | –            | –        |
| Leisink & Knies (2011)            | Stereotypes of older workers' performance              | Support of older worker commitment (P)  | .00      | –       | –        | –                     | –            | –        |
|                                   |                                                        | Support for career development (P)      | -.16     | –       | –        | –                     | –            | –        |
|                                   |                                                        | Support of older worker commitment (P)  | -.06     | –       | –        | –                     | –            | –        |

| Article                                      | Management Factor                         | HRM-CPO Category                                  | <i>r</i>                           | <i>β</i> | <i>B</i> | <i>R</i> <sup>2</sup> | <i>ΔR</i> <sup>2</sup> | <i>d</i> |   |
|----------------------------------------------|-------------------------------------------|---------------------------------------------------|------------------------------------|----------|----------|-----------------------|------------------------|----------|---|
| Neves, Almedia, & Velez (2018)               | Stereotypes of older workers' flexibility | Support for career development (P)                | -.07                               | —        | —        | —                     | —                      | —        |   |
|                                              |                                           | Support of older worker commitment (P)            | .39                                | —        | —        | —                     | —                      | —        |   |
|                                              | Ability to coach older workers            | Support for career development (P)                | .41                                | —        | —        | —                     | —                      | —        |   |
|                                              |                                           | Support of older worker commitment (P)            | .56                                | —        | —        | —                     | —                      | —        |   |
|                                              | Willingness to coach older workers        | Support for career development (P)                | .50                                | —        | —        | —                     | —                      | —        |   |
|                                              |                                           | Commitment-based HR practices (C)                 | .50                                | —        | —        | —                     | —                      | —        |   |
|                                              | Ethical leadership                        | Affective commitment to change (O)                | .21                                | .20      | —        | —                     | —                      | —        |   |
|                                              |                                           | Intention to resist change (O)                    | -.05                               | .12      | —        | —                     | —                      | —        |   |
|                                              | Op de Beeck, Wynen, & Hondeghem (2016)    | HR capacity                                       | HR instruments and information (C) | -.00     | —        | —                     | —                      | —        | — |
|                                              |                                           |                                                   | Personnel red tape (P)             | -.01     | —        | —                     | —                      | —        | — |
| HR department support (P)                    |                                           |                                                   | .10                                | —        | —        | —                     | —                      | —        |   |
| Devolution (P)                               |                                           |                                                   | -.08                               | —        | —        | —                     | —                      | —        |   |
| Pak & Kim (2018)                             | Implementation behaviors                  | HR intensity (P)                                  | .56                                | —        | —        | —                     | —                      | —        |   |
|                                              |                                           | Team performance (O)                              | .48                                | .26      | —        | .38                   | .05                    | —        |   |
|                                              |                                           | HR-induced psychological contract fulfillment (O) | .15                                | .33      | —        | .51                   | —                      | —        |   |
|                                              |                                           | Employee in-role performance (O)                  | .26                                | —        | —        | —                     | —                      | —        |   |
|                                              |                                           | Employee OCB (O)                                  | .23                                | —        | —        | —                     | —                      | —        |   |
| Perry & Kulik (2008)                         | Support                                   | Devolution strategy (P)                           | .34                                | —        | —        | —                     | —                      | —        |   |
|                                              |                                           | People management effectiveness (O)               | .54                                | .64      | —        | .37                   | .04                    | —        |   |
| Prieto-Pastor & Martin-Perez (2015)          | Support                                   | High-involvement HR systems (C)                   | .49                                | —        | —        | —                     | —                      | —        |   |
|                                              |                                           | Employee behavioral ambidexterity (O)             | .51                                | .26      | —        | .52                   | —                      | —        |   |
|                                              |                                           | Firm ambidextrous learning (O)                    | .52                                | —        | —        | —                     | —                      | —        |   |
| Reichel & Lazarova (2013)                    | Responsibility for HRM                    | Degree of outsourcing core HR activities (P)      | -.06                               | —        | —        | —                     | —                      | —        |   |
|                                              |                                           | Degree of outsourcing noncore HR activities (P)   | -.09                               | —        | —        | —                     | —                      | —        |   |
|                                              |                                           | Strategic position of HR department (O)           | -.17                               | -.03     | —        | —                     | —                      | —        |   |
| Ryu & Kim (2013)                             | Involvement in HR                         | Institutionally emerging HR system (C)            | .03                                | —        | —        | —                     | —                      | —        |   |
|                                              |                                           | HR knowledge transfer to LTMMs (P)                | .22                                | —        | —        | —                     | —                      | —        |   |
|                                              |                                           | HR effectiveness (O)                              | .15                                | .18      | —        | .14                   | .03                    | —        |   |
| Shipton, Sanders, Atkinson, & Frenkel (2016) | Employee champion role                    | Employee affective commitment (O)                 | .09                                | .17      | —        | —                     | —                      | —        |   |
|                                              | Strategic partner role                    | Employee affective commitment (O)                 | .02                                | .07      | —        | —                     | —                      | —        |   |
|                                              | Change agent role                         | Employee affective commitment (O)                 | .03                                | .11      | —        | —                     | —                      | —        |   |
|                                              | Administrative expert role                | Employee affective commitment (O)                 | -.04                               | .06      | —        | —                     | —                      | —        |   |
| Sikora & Ferris (2011)                       | HR capacity                               | HRM implementation level (O)                      | .30                                | .11      | —        | —                     | —                      | —        |   |
|                                              | HR competency                             | HRM implementation level (O)                      | .52                                | .39      | —        | —                     | —                      | —        |   |
|                                              | Relationship with HR department           | HRM implementation level (O)                      | .39                                | -.28     | —        | —                     | —                      | —        |   |
|                                              | Accountability                            | HRM implementation level (O)                      | .52                                | .48      | —        | —                     | —                      | —        |   |
|                                              | Perceptions of HR appropriateness         | HRM implementation level (O)                      | .44                                | .38      | —        | —                     | —                      | —        |   |
|                                              | Perceptions of HR effectiveness           | HRM implementation level (O)                      | .43                                | -.13     | —        | —                     | —                      | —        |   |
| Sikora, Ferris, & Van Iddekinge (2015)       | HR competency                             | Implementation perceptions (P)                    | .34                                | .27      | —        | —                     | —                      | —        |   |
|                                              |                                           | Employee turnover intentions (O)                  | -.14                               | —        | —        | —                     | —                      | —        |   |
|                                              |                                           | Employee job performance (O)                      | .24                                | —        | —        | —                     | —                      | —        |   |
|                                              |                                           | Employee participative decision-making (O)        | .14                                | —        | —        | —                     | —                      | —        |   |

| Article                           | Management Factor                 | HRM-CPO Category                           | <i>r</i> | $\beta$ | <i>B</i> | <i>R</i> <sup>2</sup> | $\Delta R^2$ | <i>d</i> |
|-----------------------------------|-----------------------------------|--------------------------------------------|----------|---------|----------|-----------------------|--------------|----------|
| Stirpe, Trullen, & Bonache (2013) | Political skill                   | Implementation perceptions (P)             | .21      | .14     | —        | —                     | —            | —        |
|                                   |                                   | Employee turnover intentions (O)           | -.04     | —       | —        | —                     | —            | —        |
|                                   |                                   | Employee job performance (O)               | .21      | —       | —        | —                     | —            | —        |
|                                   | Implementation perceptions        | Employee participative decision-making (O) | .09      | —       | —        | —                     | —            | —        |
|                                   |                                   | Employee turnover intentions (O)           | -.67     | -.40    | —        | —                     | —            | —        |
|                                   |                                   | Employee job performance (O)               | .69      | .52     | —        | —                     | —            | —        |
|                                   | Support for HR innovations (HRIs) | Employee participative decision-making (O) | .63      | .30     | —        | —                     | —            | —        |
|                                   |                                   | HR department credibility (P)              | —        | —       | —        | —                     | —            | —        |
|                                   |                                   | TMT support for HRIs (P)                   | .48      | —       | —        | —                     | —            | —        |
|                                   |                                   | Employee acceptance of HRIs (O)            | .47      | .29     | —        | .50                   | .52          | —        |
| Vermeeren (2014)                  | Transformational leadership       | Implemented HR (P)                         | .49      | .43     | —        | —                     | —            | —        |
|                                   |                                   | Perceived HR (P)                           | .11      | —       | —        | —                     | —            | —        |
|                                   |                                   | Perceived unit performance (O)             | .20      | —       | —        | —                     | —            | —        |

*Note.* C = HRM Content. P = HRM Process. O = HRM Outcomes. *r* = bivariate correlation coefficients.  $\beta$  = standardized coefficients. *B* = unstandardized coefficients. *R*<sup>2</sup> = coefficients of determination.  $\Delta R^2$  = change in *R*<sup>2</sup>. *d* = Cohen's *d*.

Table S-2

Summary of Effect Sizes for HR Managers and Human Resource Management Content, Process, and Outcomes

| Article                                   | Management Factor                  | HRM-CPO Category                         | <i>r</i> | $\beta$ | <i>B</i> | <i>R</i> <sup>2</sup> | $\Delta R^2$ | <i>d</i> |
|-------------------------------------------|------------------------------------|------------------------------------------|----------|---------|----------|-----------------------|--------------|----------|
| Bjorkman, Ehrnrooth, Smale, & John (2011) | HR experience                      | LTMM internalization of HRM content (P)  | .26      | –       | .33      | –                     | –            | –        |
|                                           | Non-HR experience                  | LTMM internalization of HRM content (P)  | -.10     | –       | .17      | –                     | –            | –        |
|                                           | Education                          | LTMM internalization of HRM content (P)  | .05      | –       | 1.03     | –                     | –            | –        |
|                                           | Position tenure                    | LTMM internalization of HRM content (P)  | .05      | –       | 1.08     | –                     | –            | –        |
|                                           | External networking                | LTMM internalization of HRM content (P)  | .11      | –       | .06      | –                     | –            | –        |
| Chen, Hsu, & Yip (2011)                   | Involvement in strategic planning  | Firm performance (O)                     | .14      | .37     | –        | –                     | –            | –        |
|                                           | Perception discrepancy             | Firm performance (O)                     | -.06     | -.34    | –        | –                     | –            | –        |
|                                           | Horizontal collaboration with LTMM | Firm performance (O)                     | .37      | .18     | –        | –                     | –            | –        |
| Darwish & Singh (2013)                    | Strategic involvement              | Devolution to LTMMs (P)                  | .60      | –       | –        | –                     | –            | –        |
|                                           |                                    | Turnover (O)                             | -.78     | -.77    | –        | –                     | –            | –        |
|                                           |                                    | Return on assets (O)                     | .45      | .48     | –        | –                     | –            | –        |
|                                           |                                    | Return on equity (O)                     | .40      | .42     | –        | –                     | –            | –        |
|                                           |                                    | Quality and commitment (O)               | .49      | –       | –        | –                     | –            | –        |
| Guest & Conway (2011)                     | Perceptions of HRM effectiveness   | Labor turnover (O)                       | -.11     | –       | –        | –                     | –            | –        |
|                                           |                                    | Financial performance (O)                | .16      | –       | –        | –                     | –            | –        |
|                                           |                                    | Labor productivity (O)                   | .22      | –       | –        | –                     | –            | –        |
|                                           |                                    | Quality of product/services (O)          | .30      | –       | –        | –                     | –            | –        |
|                                           |                                    | CEO perceptions of HRM effectiveness (P) | .10      | –       | –        | –                     | –            | –        |
|                                           | Consensus with CEO perceptions     | Quality and commitment (O)               | .02      | –       | –        | –                     | –            | –        |
|                                           |                                    | Labor turnover (O)                       | -.03     | –       | –        | –                     | –            | –        |
|                                           |                                    | Financial performance (O)                | .06      | –       | –        | –                     | –            | –        |
|                                           |                                    | Labor productivity (O)                   | .04      | –       | –        | –                     | –            | –        |
|                                           |                                    | Quality of product/services (O)          | .07      | –       | –        | –                     | –            | –        |
|                                           |                                    | Strategic HRM effectiveness (P)          | .41      | .34     | –        | –                     | –            | –        |
|                                           |                                    | Technical HRM effectiveness (P)          | .25      | .20     | –        | –                     | –            | –        |
| Huselid, Jackson, & Schuler (1997)        | HRM capabilities                   | Employee productivity (O)                | .02      | –       | –        | –                     | –            | –        |
|                                           |                                    | Cash flow (O)                            | .00      | –       | –        | –                     | –            | –        |
|                                           |                                    | Market value (O)                         | .11      | –       | –        | –                     | –            | –        |
|                                           |                                    | Strategic HRM effectiveness (P)          | .23      | .06     | –        | –                     | –            | –        |
|                                           | Business-related capabilities      | Technical HRM effectiveness (P)          | .05      | -.03    | –        | –                     | –            | –        |
|                                           |                                    | Employee productivity (O)                | .00      | –       | –        | –                     | –            | –        |
|                                           |                                    | Cash flow (O)                            | .09      | –       | –        | –                     | –            | –        |
|                                           |                                    | Market value (O)                         | .07      | –       | –        | –                     | –            | –        |
|                                           |                                    | Toxin handling formalization (C)         | .20      | –       | –        | –                     | –            | –        |
| Kulik, Cregan, Metz, & Brown (2009)       | Toxin handling                     | Emotional exhaustion (O)                 | -.02     | .04     | –        | –                     | –            | –        |
|                                           |                                    | HRM effectiveness (O)                    | -.03     | .01     | –        | –                     | –            | –        |
|                                           |                                    | Depth of outsourcing (P)                 | .18      | –       | –        | –                     | –            | –        |
| Lievens & Corte (2008)                    | Continuance commitment             | Length of outsourcing relationship (P)   | .60      | .02     | –        | –                     | –            | –        |

| Article                                        | Management Factor     | HRM-CPO Category                         | $r$ | $\beta$ | $B$ | $R^2$ | $\Delta R^2$ | $d$ |
|------------------------------------------------|-----------------------|------------------------------------------|-----|---------|-----|-------|--------------|-----|
| Sheehan, Cooper, Holland,<br>& De Cieri (2007) | Affective commitment  | Frequency of HR outsourcing (P)          | .03 | –       | –   | –     | –            | –   |
|                                                |                       | Depth of outsourcing (P)                 | .27 | .19     | –   | –     | –            | –   |
|                                                |                       | Length of outsourcing relationship (P)   | .14 | .13     | –   | –     | –            | –   |
|                                                |                       | Frequency of HR outsourcing (P)          | .29 | .29     | –   | –     | –            | –   |
|                                                | Strategic involvement | HRM policy connectedness (P)             | .27 | –       | –   | –     | –            | –   |
|                                                |                       | Perceived organizational performance (O) | .19 | .02     | –   | –     | –            | –   |

*Note.* C = HRM Content. P = HRM Process. O = HRM Outcomes.  $r$  = bivariate correlation coefficients.  $\beta$  = standardized coefficients.  $B$  = unstandardized coefficients.  $R^2$  = coefficients of determination.  $\Delta R^2$  = change in  $R^2$ .  $d$  = Cohen's  $d$ .

Table S-3

Summary of Effect Sizes for Top Management Teams and Human Resource Management Content, Process, and Outcomes

| Article                                               | Management Factor                                                          | HRM-CPO Category                                 | <i>r</i> | $\beta$ | <i>B</i> | <i>R</i> <sup>2</sup> | $\Delta R^2$ | <i>d</i> |
|-------------------------------------------------------|----------------------------------------------------------------------------|--------------------------------------------------|----------|---------|----------|-----------------------|--------------|----------|
| Ali & Konrad (2017)                                   | Gender diversity                                                           | Gender diversity practices (C)                   | .14      | –       | 1.70     | .08                   | –            | –        |
|                                                       |                                                                            | Diversity leadership practices (C)               | .17      | –       | 1.27     | .07                   | –            | –        |
|                                                       |                                                                            | Work-life programs (C)                           | .19      | –       | 8.35     | .05                   | –            | –        |
|                                                       |                                                                            | Net profit margin (O)                            | .00      | –       | 45.36    | –                     | –            | –        |
|                                                       |                                                                            | Return on assets (O)                             | -.03     | –       | -2.50    | –                     | –            | –        |
|                                                       |                                                                            | Corporate social responsibility (O)              | .22      | –       | .60      | –                     | –            | –        |
| Arthur, Herdman, & Yang (2016)                        | Cause-effect beliefs                                                       | Intensity of HR programs (P)                     | .26      | –       | –        | –                     | –            | –        |
|                                                       |                                                                            | Perceived HR practices (O)                       | .14      | –       | –        | –                     | –            | –        |
|                                                       | HR values                                                                  | Intensity of HR programs (P)                     | .31      | –       | –        | –                     | –            | –        |
|                                                       |                                                                            | Perceived HR practices (O)                       | .07      | –       | –        | –                     | –            | –        |
| Barrick, Thurgood, Smith, & Courtright (2015)         | Strategic implementation                                                   | HR practices (C)                                 | .45      | –       | –        | –                     | –            | –        |
|                                                       |                                                                            | Collective organizational engagement (O)         | .33      | –       | –        | –                     | –            | –        |
|                                                       |                                                                            | Return on assets (O)                             | .11      | –       | –        | –                     | –            | –        |
| Camelo-Ordaz, Fernandez-Alled, & Valle-Cabrera (2008) | Innovative strategic vision                                                | Firm innovation (O)                              | –        | -.76    | –        | –                     | –            | –        |
|                                                       |                                                                            | Compensation (C)                                 | –        | –       | –        | –                     | –            | –        |
|                                                       |                                                                            | Performance assessment (C)                       | –        | –       | –        | –                     | –            | –        |
| Carmeli (2008)                                        | Behavioral integration                                                     | Service quality and development (O)              | .29      | .27     | –        | .08                   | .07          | –        |
|                                                       |                                                                            | HR performance (O)                               | .48      | .45     | –        | .13                   | .19          | –        |
|                                                       |                                                                            | Economic performance (O)                         | .47      | .46     | –        | .03                   | .20          | –        |
| Carmeli & Tishler (2006)                              | HR skills                                                                  | Firm performance (O)                             | .48      | .30     | –        | .24                   | .08          | –        |
|                                                       | Intellectual skills                                                        | Firm performance (O)                             | .33      | .40     | –        | .24                   | .14          | –        |
| Cogin, Sanders, & Williamson (2018)                   | % of TMT members with children                                             | Work-life support practices (C)                  | .17      | –       | –        | –                     | –            | –        |
|                                                       |                                                                            | Customer satisfaction (O)                        | .02      | .25     | –        | –                     | –            | –        |
| Farndale & Kelliher (2013)                            | Employee trust in senior management                                        | Performance appraisal procedural justice (P)     | .25      | –       | –        | –                     | –            | –        |
|                                                       |                                                                            | Performance appraisal interactional justice (P)  | .24      | –       | –        | –                     | –            | –        |
|                                                       |                                                                            | Employee organizational commitment (O)           | .49      | .61     | –        | –                     | –            | –        |
| Konrad & Linnehan (1995)                              | Commitment to equal employment opportunities and affirmative action values | Identity-conscious HR structures (C)             | .49      | .10     | –        | .57                   | –            | –        |
|                                                       |                                                                            | Identity-blind HR structures (C)                 | .47      | .06     | –        | .45                   | –            | –        |
|                                                       |                                                                            | Ranking of top women performers (O)              | .12      | -.01    | –        | .17                   | –            | –        |
|                                                       |                                                                            | % of women in management (O)                     | .10      | .02     | –        | .26                   | –            | –        |
|                                                       |                                                                            | % of female employees (O)                        | -.04     | .00     | –        | .28                   | –            | –        |
|                                                       |                                                                            | Ranking of persons of color (POC) performers (O) | .26      | .03     | –        | .25                   | –            | –        |
|                                                       |                                                                            | % of POC in management (O)                       | .27      | .01     | –        | .25                   | –            | –        |
|                                                       |                                                                            | % of POC employees (O)                           | .33      | .06     | –        | .32                   | –            | –        |
| Milliken, Martins, & Morgan (1998)                    | Representation of work-family issues                                       | Work-family responsiveness (C)                   | -.07     | -.02    | –        | –                     | –            | –        |
|                                                       | Salience of work-family issues (women)                                     | Work-family responsiveness (C)                   | -.05     | –       | –        | –                     | –            | –        |



| Article                                  | Management Factor                                 | HRM-CPO Category                    | <i>r</i> | $\beta$ | <i>B</i> | <i>R</i> <sup>2</sup> | $\Delta R^2$ | <i>d</i> |
|------------------------------------------|---------------------------------------------------|-------------------------------------|----------|---------|----------|-----------------------|--------------|----------|
| Ordiz-Fuertes & Fernandez-Sanchez (2003) | Salience of work-family issues (family structure) | Work-family responsiveness (C)      | -.01     | –       | –        | –                     | –            | –        |
|                                          | Flexible leadership style                         | High-involvement work practices (C) | –        | –       | 3.74     | –                     | –            | –        |
| Snell & Youndt (1995)                    | Knowledge of cause-effect relationship            | Behavioral control HRM (C)          | .15      | –       | –        | –                     | –            | –        |
|                                          |                                                   | Output control HRM (C)              | .11      | –       | –        | –                     | –            | –        |
|                                          |                                                   | Input control HRM (C)               | .22      | –       | –        | –                     | –            | –        |
|                                          |                                                   | Return on assets (O)                | .12      | –       | 4.44     | –                     | –            | –        |
|                                          |                                                   | Sales growth (O)                    | .06      | –       | .13      | –                     | –            | –        |
|                                          | Articulation of performance standards             | Behavioral control HRM (C)          | .51      | –       | –        | –                     | –            | –        |
|                                          |                                                   | Output control HRM (C)              | .43      | –       | –        | –                     | –            | –        |
|                                          |                                                   | Input control HRM (C)               | .29      | –       | –        | –                     | –            | –        |
|                                          |                                                   | Return on assets (O)                | .00      | –       | -4.57    | –                     | –            | –        |
|                                          |                                                   | Sales growth (O)                    | -.15     | –       | -.13     | –                     | –            | –        |
| Stirpe, Trullen, & Bonache (2013)        | Support for HR innovations (HRIs)                 | HR department credibility (P)       | .45      | –       | –        | –                     | –            | –        |
|                                          |                                                   | LTMM support for HRIs (P)           | .38      | –       | –        | –                     | –            | –        |
|                                          |                                                   | Employee acceptance of HRIs (O)     | .48      | .18     | –        | –                     | –            | –        |
| Welbourne & Cyr (1999)                   | HR representation                                 | Stock price (O)                     | .14      | -.05    | –        | –                     | –            | –        |
|                                          |                                                   | Earnings per share (O)              | .12      | .08     | –        | –                     | –            | –        |
|                                          |                                                   | Change in sales – Time 1 (O)        | -.04     | –       | –        | –                     | –            | –        |
|                                          |                                                   | Change in sales – Time 2 (O)        | -.06     | –       | –        | –                     | –            | –        |
|                                          |                                                   | Stock price at IPO (O)              | .16      | –       | –        | –                     | –            | –        |

*Note.* C = HRM Content. P = HRM Process. O = HRM Outcomes. *r* = bivariate correlation coefficients.  $\beta$  = standardized coefficients. *B* = unstandardized coefficients. *R*<sup>2</sup> = coefficients of determination.  $\Delta R^2$  = change in *R*<sup>2</sup>. *d* = Cohen's *d*.

Table S-4

Summary of Effect Sizes for Chief Executive Officers and Human Resource Management Content, Process, and Outcomes

| Article                                                    | Management Factor                     | HRM-CPO Category                                | <i>r</i> | $\beta$ | <i>B</i> | <i>R</i> <sup>2</sup> | $\Delta R^2$ | <i>d</i> |
|------------------------------------------------------------|---------------------------------------|-------------------------------------------------|----------|---------|----------|-----------------------|--------------|----------|
| Chadwick, Super, & Kwon (2015)                             | Emphasis on SHRM                      | Commitment-based HR systems (C)                 | .66      | –       | 1.10     | –                     | –            | –        |
|                                                            |                                       | Perceived performance (O)                       | .58      | –       | .51      | –                     | –            | –        |
|                                                            |                                       | Employee productivity (O)                       | .10      | –       | -.18     | –                     | –            | –        |
|                                                            |                                       | Return on equity (O)                            | .10      | –       | -2.11    | –                     | –            | –        |
| Frear, Cao, & Zhao (2012)                                  | No college degree                     | Adoption of Western-HR practices (C)            | -.09     | –       | –        | –                     | –            | –        |
|                                                            | Management or social science degree   | Adoption of Western-HR practices (C)            | .15      | –       | .47      | –                     | –            | –        |
|                                                            | Other degree                          | Adoption of Western-HR practices (C)            | -.11     | –       | .29      | –                     | –            | –        |
|                                                            | Chinese                               | Adoption of Western-HR practices (C)            | .14      | –       | –        | –                     | –            | –        |
|                                                            | Hong Kong, Macao, or Taiwanese        | Adoption of Western-HR practices (C)            | -.03     | –       | -.25     | –                     | –            | –        |
|                                                            | Other nationality                     | Adoption of Western-HR practices (C)            | -.13     | –       | -.15     | –                     | –            | –        |
|                                                            | Age                                   | Adoption of Western-HR practices (C)            | -.15     | –       | .00      | –                     | –            | –        |
| Guest & Conway (2011)                                      | Perceptions of HRM effectiveness      | Quality and commitment (O)                      | .49      | –       | –        | –                     | –            | –        |
|                                                            |                                       | Labor turnover (O)                              | -.11     | –       | –        | –                     | –            | –        |
|                                                            |                                       | Financial performance (O)                       | .16      | –       | –        | –                     | –            | –        |
|                                                            |                                       | Labor productivity (O)                          | .22      | –       | –        | –                     | –            | –        |
|                                                            |                                       | Quality of product/services (O)                 | .30      | –       | –        | –                     | –            | –        |
|                                                            | Consensus with HR manager perceptions | HR manager perceptions of HRM effectiveness (P) | .10      | –       | –        | –                     | –            | –        |
|                                                            |                                       | Quality and commitment (O)                      | .02      | –       | –        | –                     | –            | –        |
|                                                            |                                       | Labor turnover (O)                              | -.03     | –       | –        | –                     | –            | –        |
|                                                            |                                       | Financial performance (O)                       | .06      | –       | –        | –                     | –            | –        |
|                                                            |                                       | Labor productivity (O)                          | .04      | –       | –        | –                     | –            | –        |
| Khavul, Benson, & Datta (2010)                             | Educational background                | Investments in HR practices (C)                 | .08      | .44     | –        | –                     | –            | –        |
|                                                            | International experience              | Investments in HR practices (C)                 | -.03     | -.01    | –        | –                     | –            | –        |
| Lopez-Cabrales, Bornay-Barrachina, & Diaz-Fernandez (2017) | Transformational leadership           | Skill-based HR systems (C)                      | .30      | .21     | –        | –                     | –            | –        |
|                                                            |                                       | Job/function-based HR systems (C)               | .27      | .19     | –        | –                     | –            | –        |
|                                                            |                                       | Sensing dynamic capabilities (O)                | .41      | .41     | –        | –                     | –            | –        |
|                                                            |                                       | Seizing dynamic capabilities (O)                | .46      | .38     | –        | –                     | –            | –        |
|                                                            |                                       | Reconfiguration dynamic capabilities (O)        | .48      | .41     | –        | –                     | –            | –        |
|                                                            | Transactional leadership              | Skill-based HR systems (C)                      | .28      | .26     | –        | –                     | –            | –        |
|                                                            |                                       | Job/function-based HR systems (C)               | .21      | .18     | –        | –                     | –            | –        |
|                                                            |                                       | Sensing dynamic capabilities (O)                | .09      | -.08    | –        | –                     | –            | –        |
|                                                            |                                       | Seizing dynamic capabilities (O)                | .25      | .05     | –        | –                     | –            | –        |
| Mayo, Pastor, Gomez-Mejia, & Cruz (2009)                   | Contingent-reward leadership          | Reconfiguration dynamic capabilities (O)        | .25      | .12     | –        | –                     | –            | –        |
|                                                            |                                       | Telecommuting practices (C)                     | -.02     | –       | .85      | –                     | –            | –        |
| Michiels (2017)                                            | Family vs. non-family CEO             | Variable pay practices (C)                      | .06      | –       | –        | –                     | –            | –        |
|                                                            |                                       | Formal compensation practices (C)               | .32      | –       | –        | –                     | –            | –        |

| Article                                     | Management Factor           | HRM-CPO Category                         | <i>r</i> | $\beta$ | <i>B</i> | $R^2$ | $\Delta R^2$ | <i>d</i> |
|---------------------------------------------|-----------------------------|------------------------------------------|----------|---------|----------|-------|--------------|----------|
| Ng & Sears (2012)                           | Transformational leadership | Diversity practices (C)                  | .25      | —       | —        | —     | —            | —        |
|                                             | Transactional leadership    | Diversity practices (C)                  | .19      | —       | —        | —     | —            | —        |
|                                             | Social values               | Diversity practices (C)                  | .13      | —       | —        | —     | —            | —        |
|                                             | Age                         | Diversity practices (C)                  | .02      | —       | —        | —     | —            | —        |
| Sheehan, Cooper, Holland, & De Cieri (2007) | Support for HRM             | HRM policy connectedness (P)             | .23      | —       | —        | —     | —            | —        |
|                                             |                             | Perceived organizational performance (O) | .81      | .15     | —        | —     | —            | —        |
| Xi, Zhao, & Xu (2017)                       | Relationship behaviors      | Employee relations climate (P)           | .33      | .36     | —        | —     | —            | —        |
|                                             |                             | Employee affective commitment (O)        | .23      | —       | —        | —     | —            | —        |
|                                             |                             | Employee job satisfaction (O)            | .23      | —       | —        | —     | —            | —        |
|                                             |                             | Firm performance (O)                     | .39      | .17     | —        | —     | —            | —        |
|                                             | Task behaviors              | Employee relations climate (P)           | .27      | —       | —        | —     | —            | —        |
|                                             |                             | Employee affective commitment (O)        | .18      | —       | —        | —     | —            | —        |
|                                             |                             | Employee job satisfaction (O)            | .20      | —       | —        | —     | —            | —        |
|                                             |                             | Firm performance (O)                     | .37      | .27     | —        | —     | —            | —        |
| Zhu, Chew, & Spangler (2005)                | Transformational leadership | Human-capital enhancing HR systems (C)   | .66      | .63     | —        | —     | —            | —        |
|                                             |                             | Organizational performance (O)           | .57      | .59     | —        | —     | —            | —        |
|                                             |                             | Absenteeism (O)                          | -.16     | -.18    | —        | —     | —            | —        |
|                                             |                             | Sales (O)                                | .07      | .09     | —        | —     | —            | —        |
|                                             | Transactional leadership    | Human-capital enhancing HR systems (C)   | .42      | .01     | —        | —     | —            | —        |
|                                             |                             | Organizational performance (O)           | .34      | -.06    | —        | —     | —            | —        |
|                                             |                             | Absenteeism (O)                          | -.25     | -.12    | —        | —     | —            | —        |
|                                             |                             | Sales (O)                                | .02      | -.04    | —        | —     | —            | —        |

*Note.* C = HRM Content. P = HRM Process. O = HRM Outcomes. *r* = bivariate correlation coefficients.  $\beta$  = standardized coefficients. *B* = unstandardized coefficients.  $R^2$  = coefficients of determination.  $\Delta R^2$  = change in  $R^2$ . *d* = Cohen's *d*.

Table S-5

Summary of Effect Sizes for Board of Directors and Human Resource Management Content, Process, and Outcomes

| Article                                    | Management Factor                     | HRM-CPO Category                         | <i>r</i> | $\beta$           | <i>B</i> | <i>R</i> <sup>2</sup> | $\Delta R^2$ | <i>d</i> |
|--------------------------------------------|---------------------------------------|------------------------------------------|----------|-------------------|----------|-----------------------|--------------|----------|
| Everly & Schwarz (2015)                    | Director age                          | Equality index score (C)                 | –        | –                 | –        | –                     | –            | –        |
|                                            | Average tenure                        | Equality index score (C)                 | –        | –                 | –        | –                     | –            | –        |
|                                            | % of women                            | Equality index score (C)                 | –        | –                 | –        | –                     | –            | –        |
| Gould, Kulik, & Sardeshmukh (2018)         | Female BOD representation             | Inclusive selection (C)                  | .27      | .32               | –        | –                     | –            | –        |
| Mullins (2018)                             | HR expertise on BOD                   | Diversity management activities (C)      | .05      | .43               | –        | –                     | –            | .17      |
| Mullins & Holmes (2018)                    | Outsider representation               | Work-family benefits (C)                 | .19      | .92 <sup>a</sup>  | –        | –                     | –            | –        |
|                                            | Female representation                 | Work-family benefits (C)                 | .33      | 1.11 <sup>a</sup> | –        | –                     | –            | –        |
|                                            | CFO on BOD                            | Work-family benefits (C)                 | .02      | .83 <sup>a</sup>  | –        | –                     | –            | –        |
|                                            | Directors with multiple directorships | Work-family benefits (C)                 | .20      | .96 <sup>a</sup>  | –        | –                     | –            | –        |
|                                            |                                       |                                          |          |                   |          |                       |              |          |
| Sheehan, Cooper, Holland & De Cieri (2007) | HR expertise on BOD                   | HR policy connectedness (P)              | .12      | –                 | –        | –                     | –            | –        |
|                                            | HR expertise on BOD                   | Perceived organizational performance (O) | .07      | .02               | –        | –                     | –            | –        |
| Tsao, Chen, & Wang (2016)                  | Firm family ownership                 | HPWS for employees (C)                   | .04      | -.02              | –        | –                     | –            | –        |
|                                            |                                       | HPWS for managers (C)                    | .06      | -.08              | –        | –                     | –            | –        |
|                                            |                                       | Sale growth (O)                          | .24      | .08               | –        | –                     | –            | –        |
|                                            |                                       | Subjective performance (O)               | .12      | .02               | –        | –                     | –            | –        |
|                                            |                                       | HPWS for employees (C)                   | .01      | .10               | –        | –                     | –            | –        |
|                                            |                                       | HPWS for managers (C)                    | .09      | .22               | –        | –                     | –            | –        |
|                                            | Family BOD representation             | Sale growth (O)                          | .10      | .02               | –        | –                     | –            | –        |
|                                            |                                       | Subjective performance (O)               | .18      | .13               | –        | –                     | –            | –        |
|                                            |                                       | HPWS for employees (C)                   | .28      | .23               | –        | –                     | –            | –        |
|                                            |                                       | HPWS for managers (C)                    | .24      | .26               | –        | –                     | –            | –        |
|                                            |                                       | Sale growth (O)                          | -.01     | .03               | –        | –                     | –            | –        |
|                                            |                                       | Subjective performance (O)               | .20      | .13               | –        | –                     | –            | –        |

Note. C = HRM Content. P = HRM Process. O = HRM Outcomes. *r* = bivariate correlation coefficients.  $\beta$  = standardized coefficients. *B* = unstandardized coefficients. *R*<sup>2</sup> = coefficients of determination.  $\Delta R^2$  = change in *R*<sup>2</sup>. *d* = Cohen's *d*. <sup>a</sup>Logit coefficients.
